# Supplementary material for: The systematic influence of solvent on the conformational features of furanosides
Source: Royal Society of Chemistry journal article supplement (doi:10.1039/c9ob00043g), 2019-01-01
Supplement: c9ob00043g1.pdf [file c9ob00043g1.pdf]

# **The systematic influence of solvent on the conformational features of furanosides**

Karolina Gaweda, Wojciech Plazinski\*

**Supporting Information**

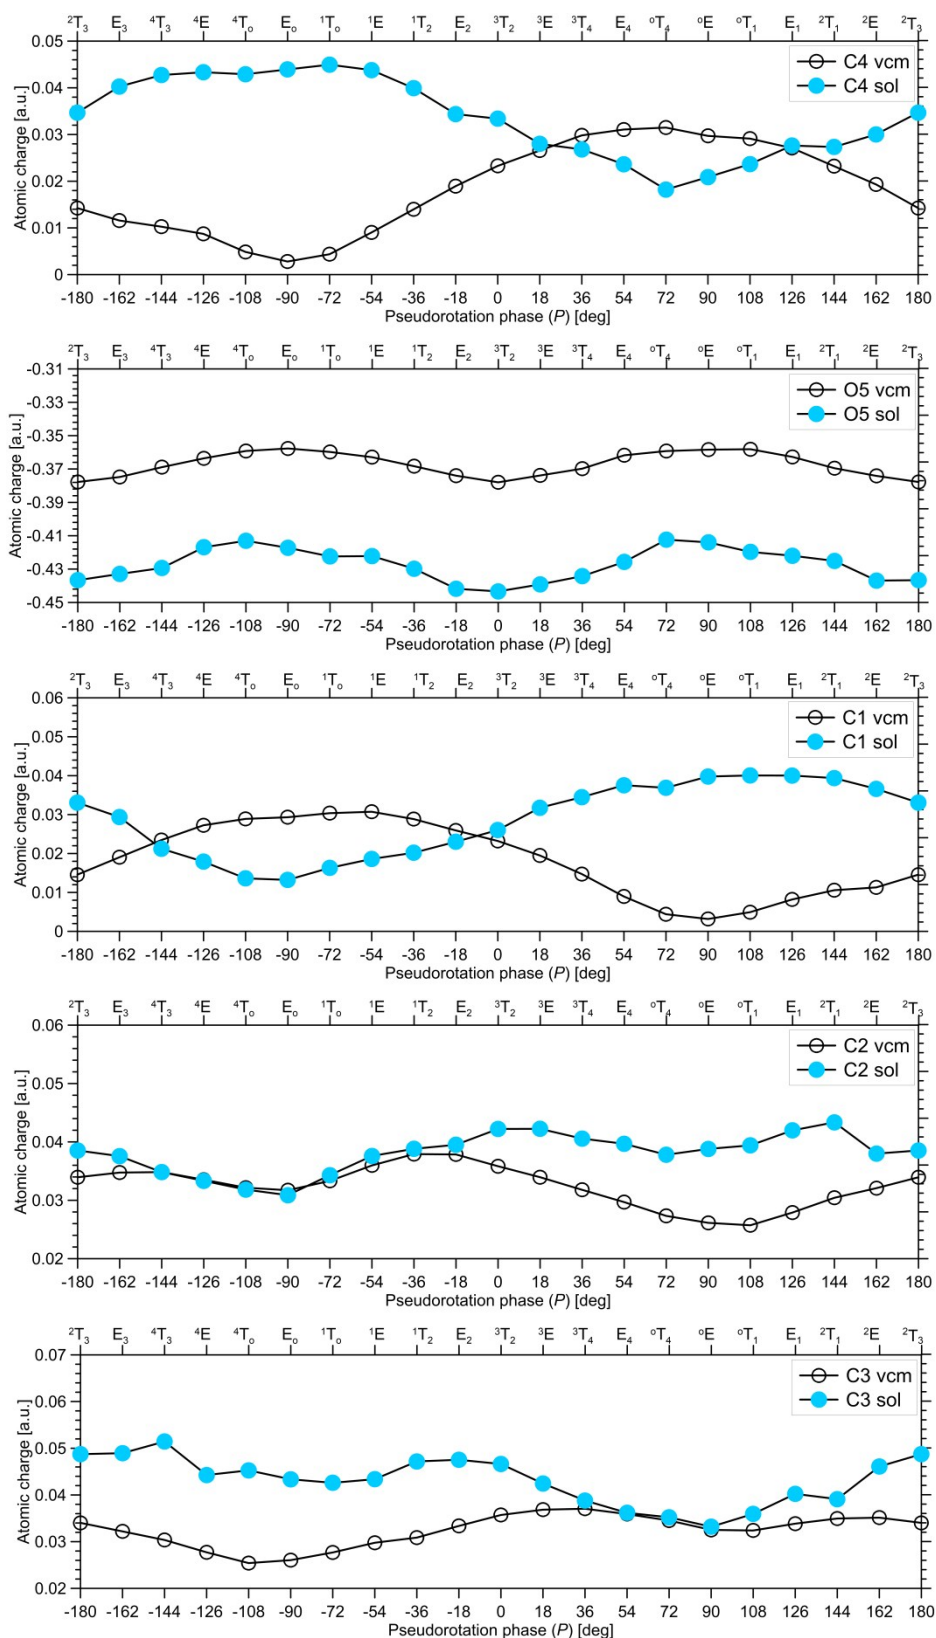

**Fig. S1.** The average atomic charges calculated for all heavy atoms in the THF molecule by using the Mulliken method [(Mulliken 1955)] in vacuum (white dots) or in aqueous solvent (blue dots). The structures used for calculations included all frames of the unbiased MD trajectories generated within the BP86/def2-SVP potential (see main manuscript for details).

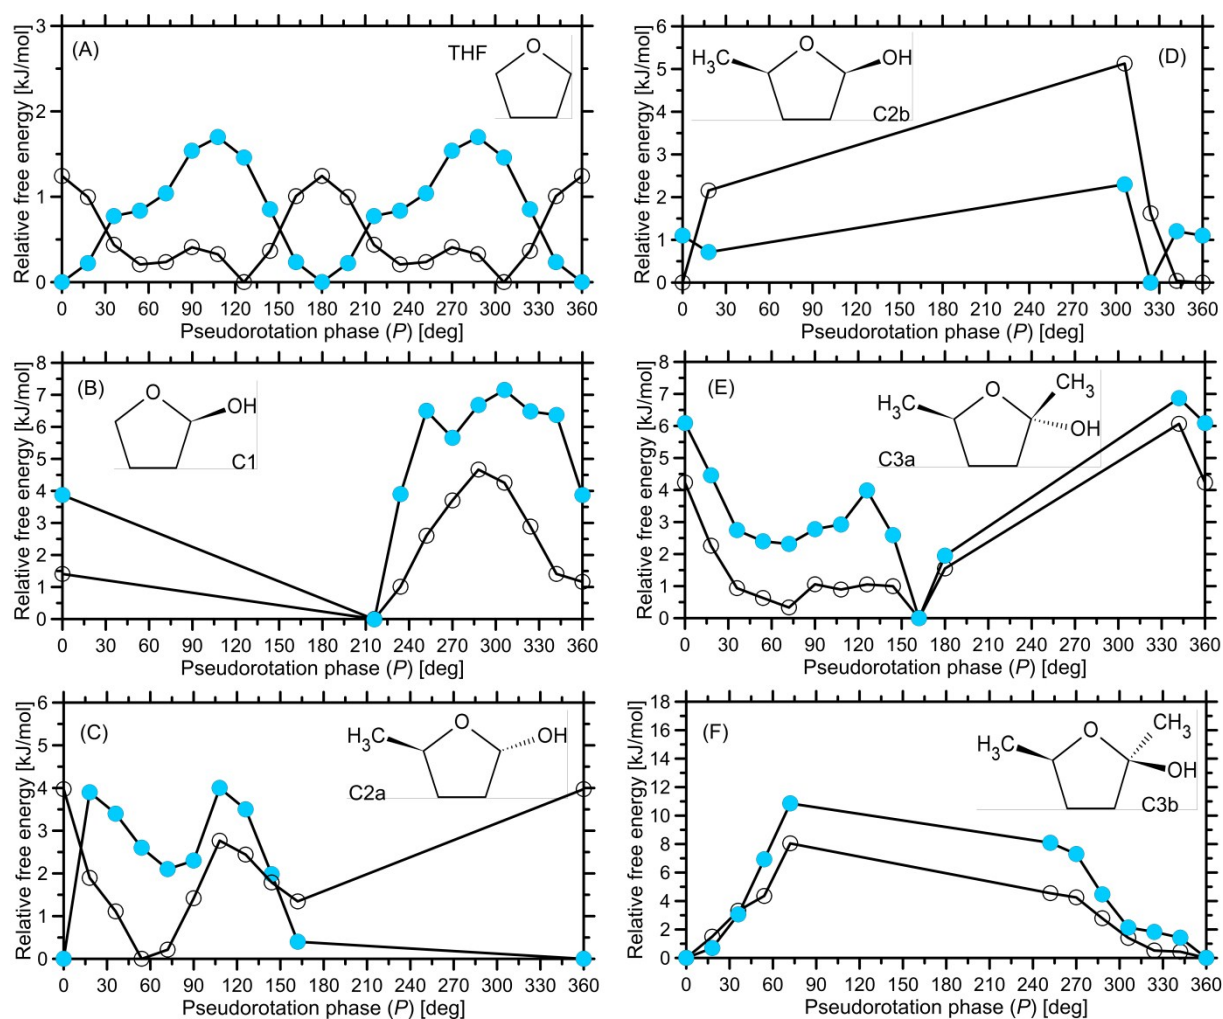

**Fig. S2.** The comparison of the pseudorotation-characteristic free energies calculated from QM/MM-MD simulations for different furanosides in vacuum (white dots) or in aqueous solvent (blue dots). The calculations relied on the BP86/def2-SVP potential (see details in the main manuscript). The energies are scaled to zero according to their lowest value.

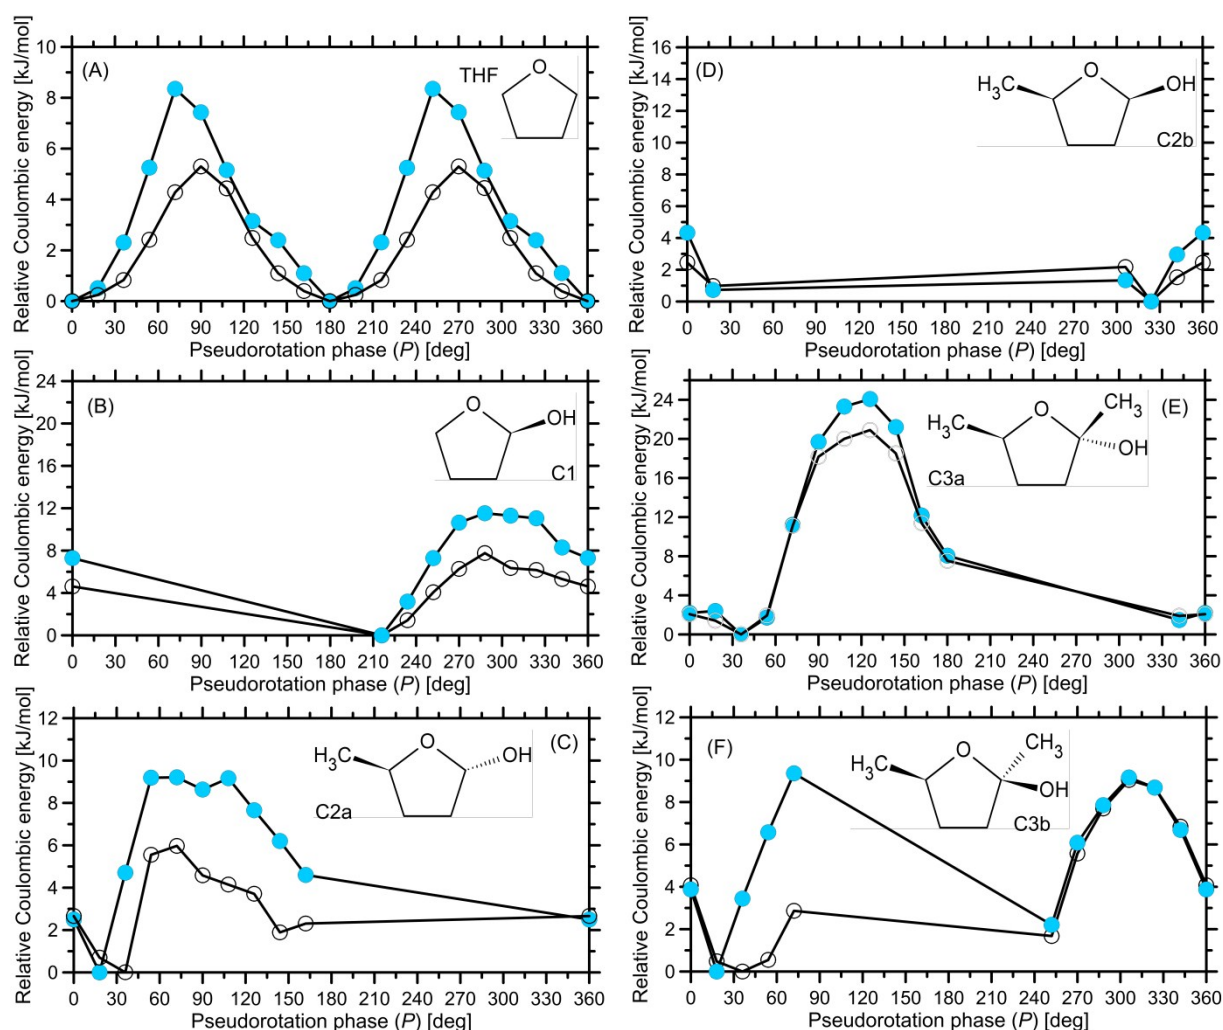

**Fig. S3.** The comparison of the pseudorotation-characteristic Coulombic energies calculated for all charge-charge interactions that may occur within furanoside ring. The charges used for calculations were obtained by applying the Mulliken method and averaged over all frames of the unbiased QM/MM-MD simulation. They corresponded to the two different cases, i.e. furanosides in vacuum (white dots) or in aqueous solvent (blue dots). The energies are scaled to zero according to their lowest value.

## References

- Mulliken, R. S., *J. Chem. Phys.* **1955**, 23, 10, 1833–1840.  
 Wu, A.; Cremer, D. *Int. J. Mol. Sci.* **2003**, 4, 158–192.
